# Supplementary material for: Metabolite profiling and quantitative genetics of natural variation for flavonoids in Arabidopsis
Source: PubMed Central journal article supplement — J Exp Bot. 2012 Mar 22;63(10):3749–64. doi: 10.1093/jxb/ers067 (PMC3388840; doi:10.1093/jxb/ers067), 2012-03-22
Supplement: supp_ers067_00072496-file001.pdf [file supp_ers067_00072496-file001.pdf]

# Metabolite Profiling and Quantitative Genetics of Natural Variation for Flavonoids in Arabidopsis

Jean-Marc Routaboul \*, Christian Dubos, Gilles Beck<sup>1</sup>, Catherine Marquis, Przemyslaw Bidzinski<sup>2</sup>, Olivier Loudet, Loïc Lepiniec.

Institut Jean-Pierre Bourgin, UMR1318 INRA-AgroParisTech, F-78000 Versailles, France.

## Supplementary data

**Fig. S1.** Natural variation of seed flavonoid content in five contrasted accessions of Arabidopsis.

**Fig. S2.** Confirmation of the major QTLs of the recombinant population Cvi-0 x Col-0 by comparison of the phenotypes of Heterogeneous Inbred Families (HIF).

**Fig. S3.** Confirmation of the major QTLs of the recombinant population Bay-0 and Shahdara by comparison of the phenotypes of heterogeneous Inbred Families (HIF).

**Fig. S4.** Mutation in 72B1 or ANL2 cannot explain natural variation corresponding to QTL FLA16.

**Fig. S5.** Three additional glycosylated flavonols in Shahdara genotype.

**Fig. S6:** QTL 5, 13 and 15 are also confirmed in leaves using HIF lines (HIFs 223 and 301, HIFs157 and 216, HIFs 157 and 214, respectively).

**Table S1:** Flavonoid content ( $\text{mg.g}^{-1}$ ) in accessions.

**Table S2:** Correlations ( $r$  and  $p$  values) between the different flavonoid in selected accessions

**Table S3:** Correlations ( $r$  and  $p$  values) between the different flavonoid in selected recombinant inbred lines of Cvi-0xCol-0.

**Table S4:** Correlations ( $r$  and  $p$  values) between the different flavonoid in selected recombinant inbred lines of Bay-0 x Shahdara.

**Table S5:** Flavonoid content in selected Cvi-0 x Col-0 RIL lines.

**Table S6:** Flavonoid content in selected Bay-0 x Sha. RIL lines.

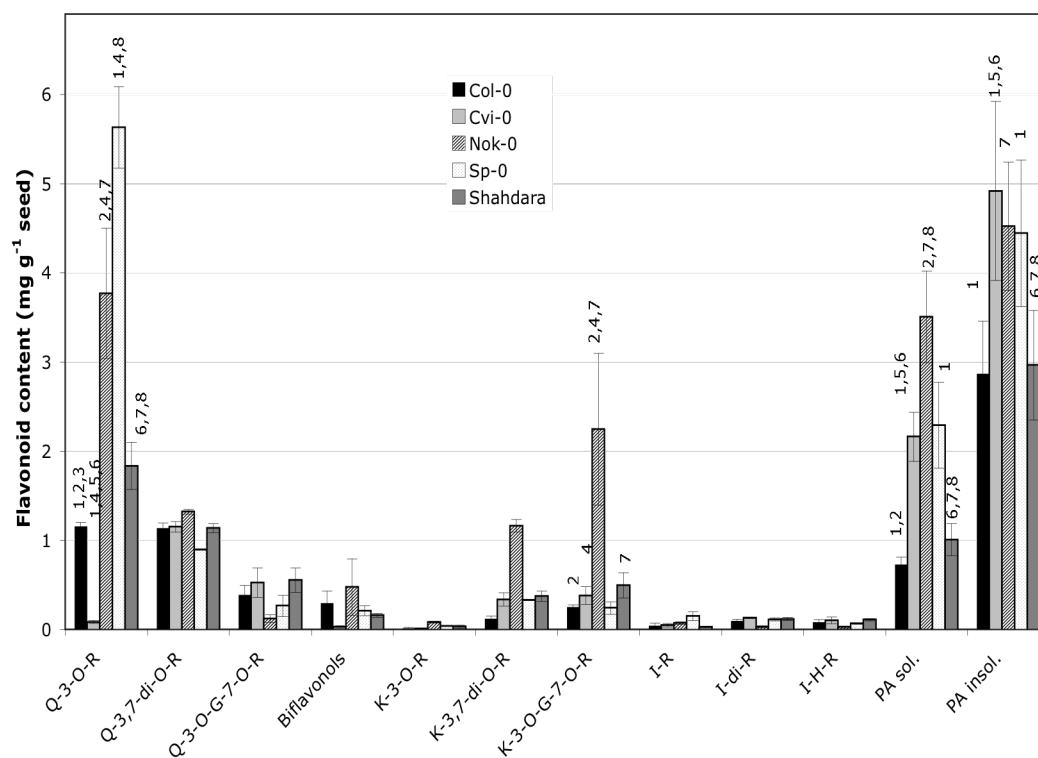

**Fig. S1** : Natural variation of seed flavonoid content in five contrasted accessions of Arabidopsis. Values are means of three independent measurements  $\pm$ SE. All individual compounds measured with LC-MS and PAs measured with acid catalysed hydrolysis. Same number indicates significant difference with  $p \leq 5\%$ . G: glucoside, H: hexoside, I: isorhamnetin, insol.: insoluble, K: kaempferol, Q: quercetin, PA: proanthocyanidin, R: rhamnoside, sol.: soluble.

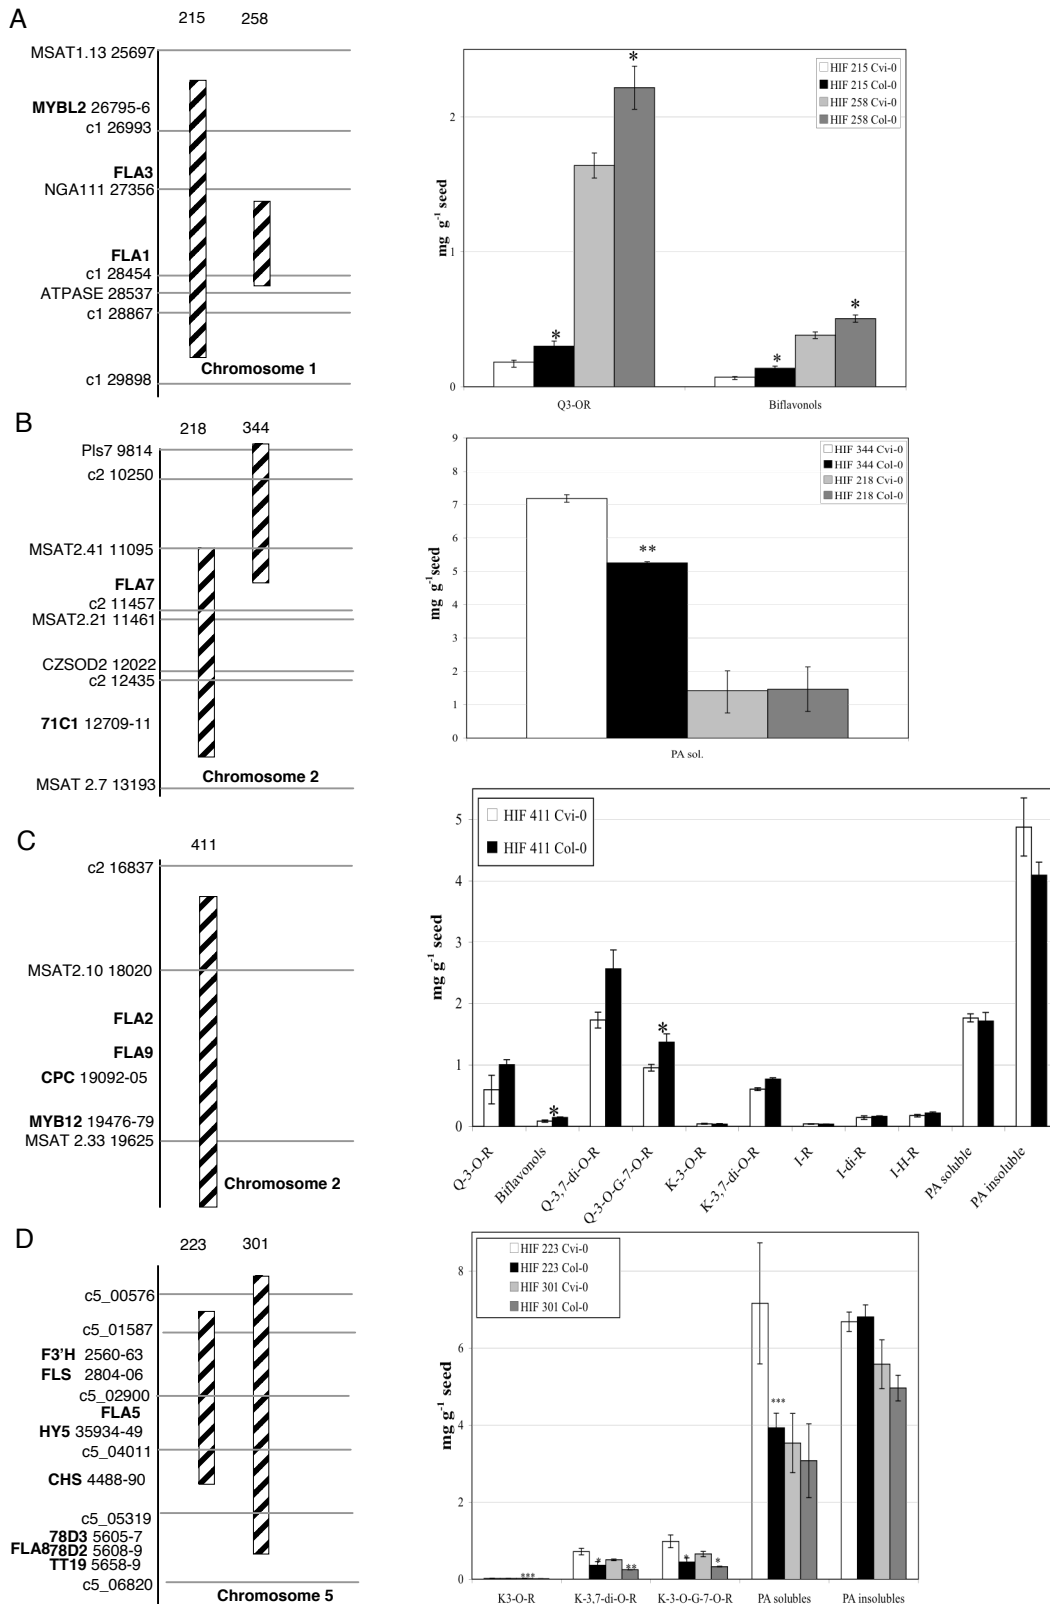

**Fig. S2** : Confirmation of the major QTLs of the recombinant population Col-0xCvi-0 by comparison of the phenotypes of heterogeneous Inbred Families (HIF).

(A-C) F9 Recombinant Inbred Lines from the Col-0xCvi-0 cross which show residual heterozygosity in the region of the QTLs. Markers and candidate genes (in bold) are indicated and number designate the RIL with hatched bar beneath indicating the region which is still heterozygous. Recombination breakpoint are arbitrarily depicted in the middle of the marker interval.

(D-F) Comparison of the flavonoid content for HIFs which segregated in the region shown in (A) to (C) and which had been fixed for the Col-0 or the Cvi-0 allele. Errors bars represent SE values of three representative biological repeats). Significance in *t*-test at \* 5% level and \*\* 1% level. G: glucoside. I: isorhamnetin. insol.: insoluble. K: kaempferol. Q: quercetin. PA: proanthocyanidin. R: rhamnoside. sol.: soluble

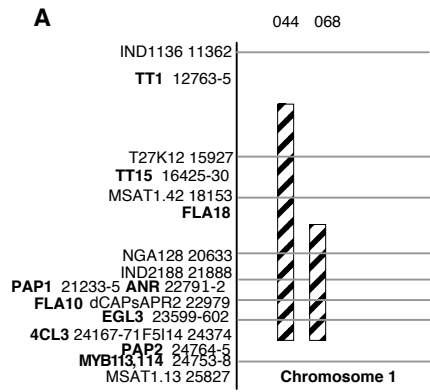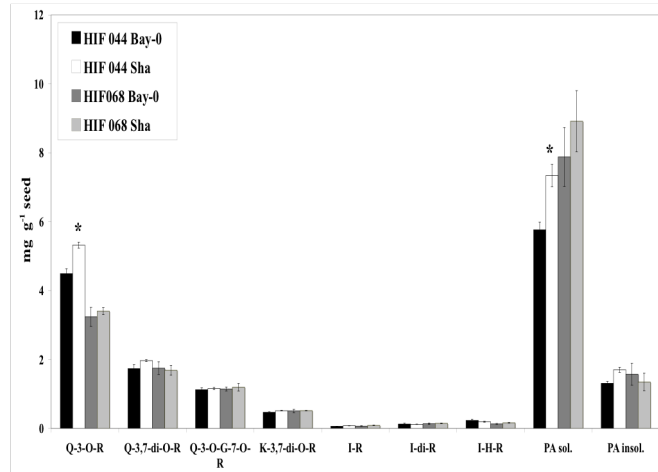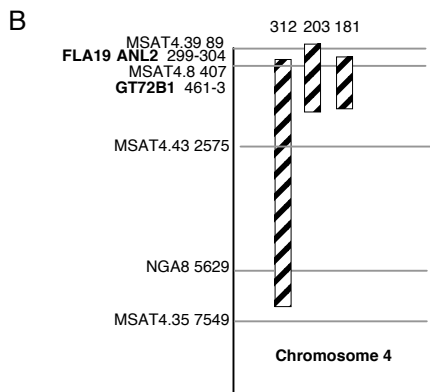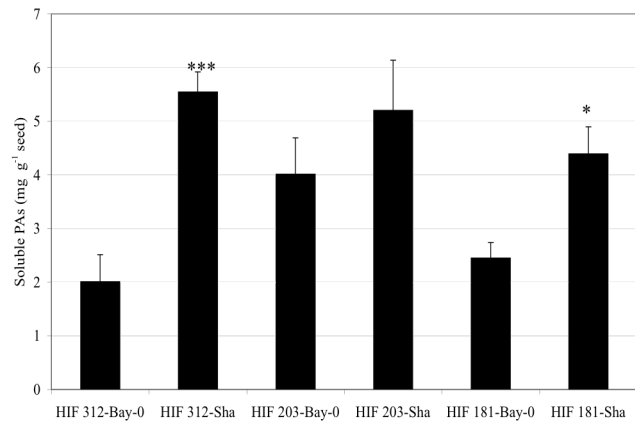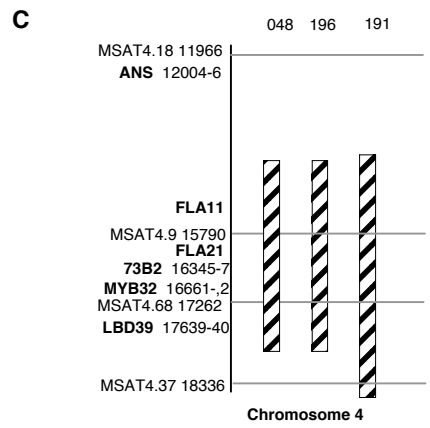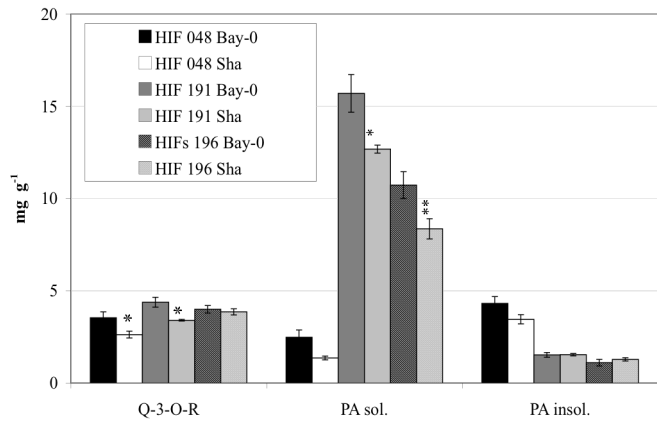

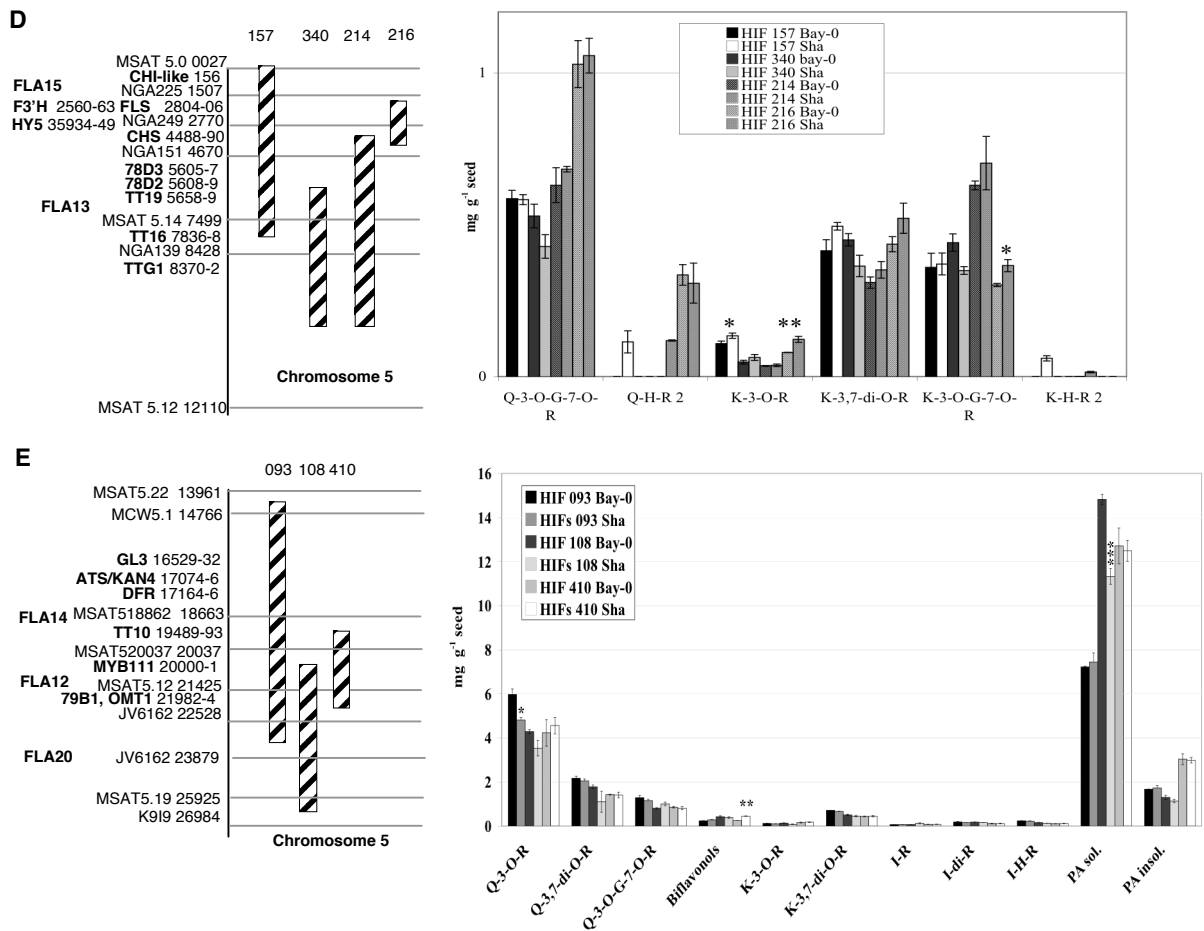

**Fig. S3** : Confirmation of the major QTLs of the recombinant population Bay-0 and Shahdara by comparison of the phenotypes of heterogeneous Inbred Families (HIF).

(A-C) F9 Recombinant Inbred Lines from the Col-0xCvi-0 cross which show residual heterozygosity in the region of the QTLs.

Markers and candidate genes (in bold) are indicated and number designate the RIL with hatched bar beneath indicating the region which is still heterozygous. Recombination breakpoint are arbitrarily depicted in the middle of the marker interval.

(D-F) Comparison of the flavonoid content for HIFs which segregated in the region shown in (A) to (C) and which had been fixed for the Col-0 or the Cvi-0 allele. Errors bars represent SE values of three representative biological repeats. Significance in *t*-test at \* 5% . \*\* 1% and \*\*\* 0.1% level. G: glucoside. I: isorhamnetin. insol.: insoluble. K: kaempferol. Q: quercetin. PA: proanthocyanidin. R: rhamnoside. sol.: soluble

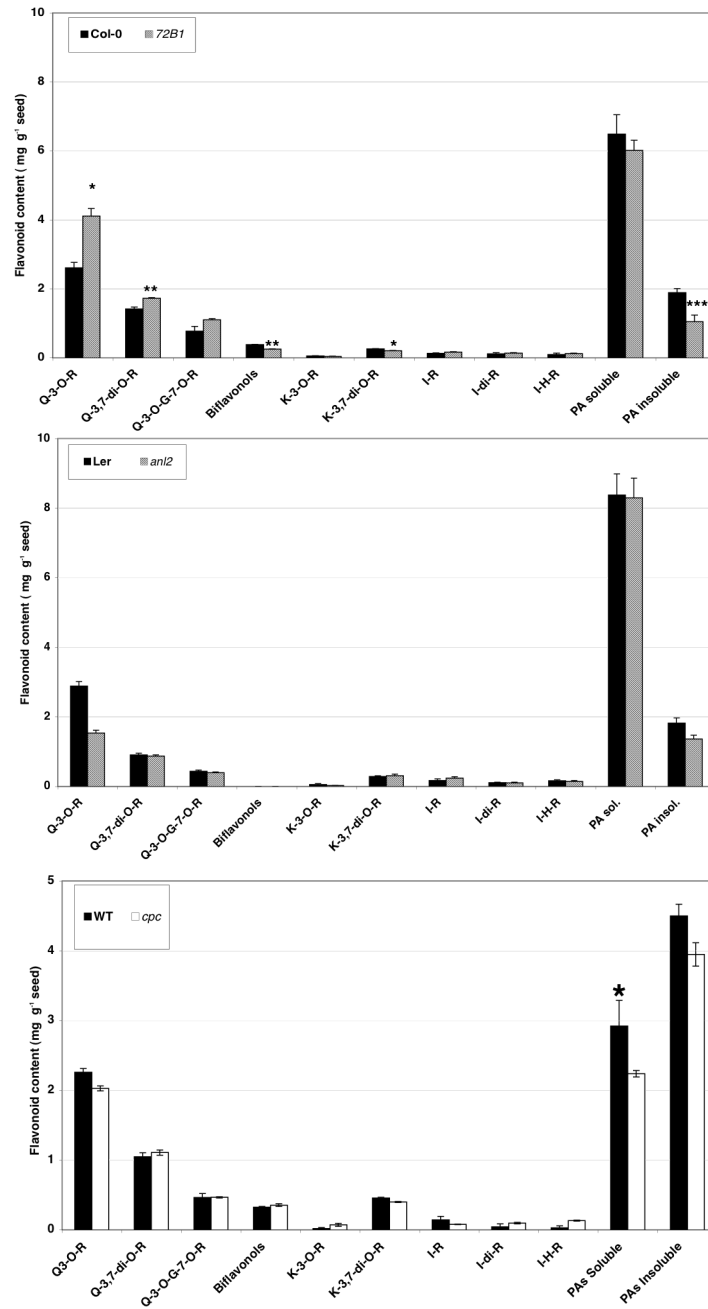

**Fig. S 4:** Mutations in *72B1* and *ANL2*, or *CPC* genes do not affect flavonoid such as in QTL FLA16 and FLA2 respectively. G: glucoside. I: isorhamnetin. insol.: insoluble. K: kaempferol. Q: quercetin. PA: proanthocyanidin. R: rhamnoside. sol.: soluble

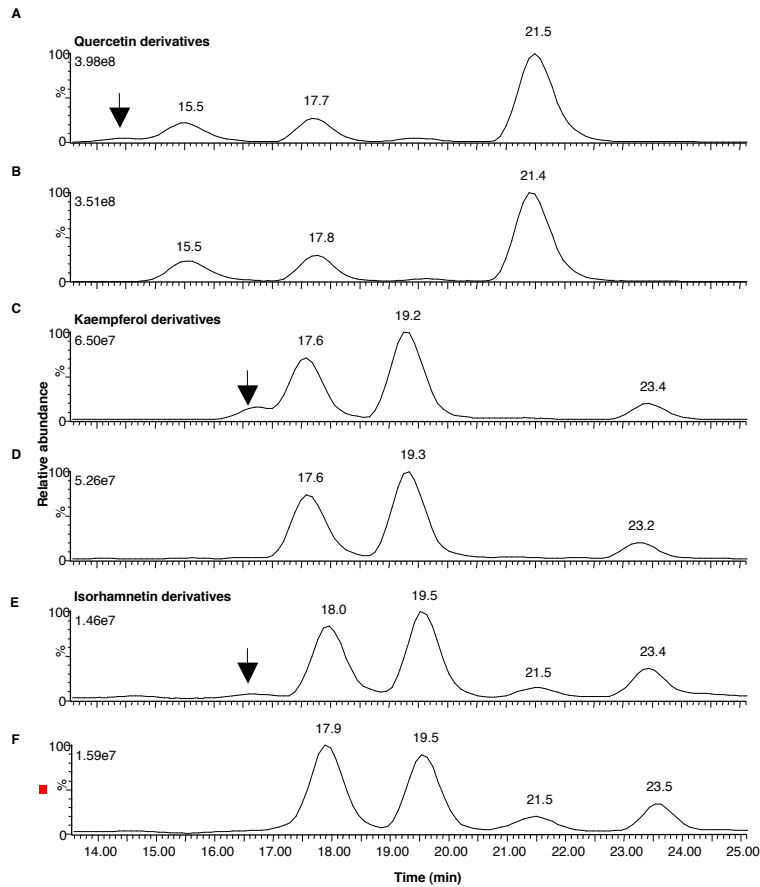

**Fig. S5:** Three glycosilated flavonols suggest the occurrence of a new glycosyltransferase in Shahdara genotype. Mass chromatogram showing the different flavonol derivatives in extracts of recombinant inbred lines fixed for Shahdara (A. C. E) or Bay-0 (B. D. F) genotypes around 7Mb on Chromosome 5. (cone potential 60V). Arrows shows the synthesis of new rhamnosyl-hexosyl flavonols in the Shahdara fixed genotype.

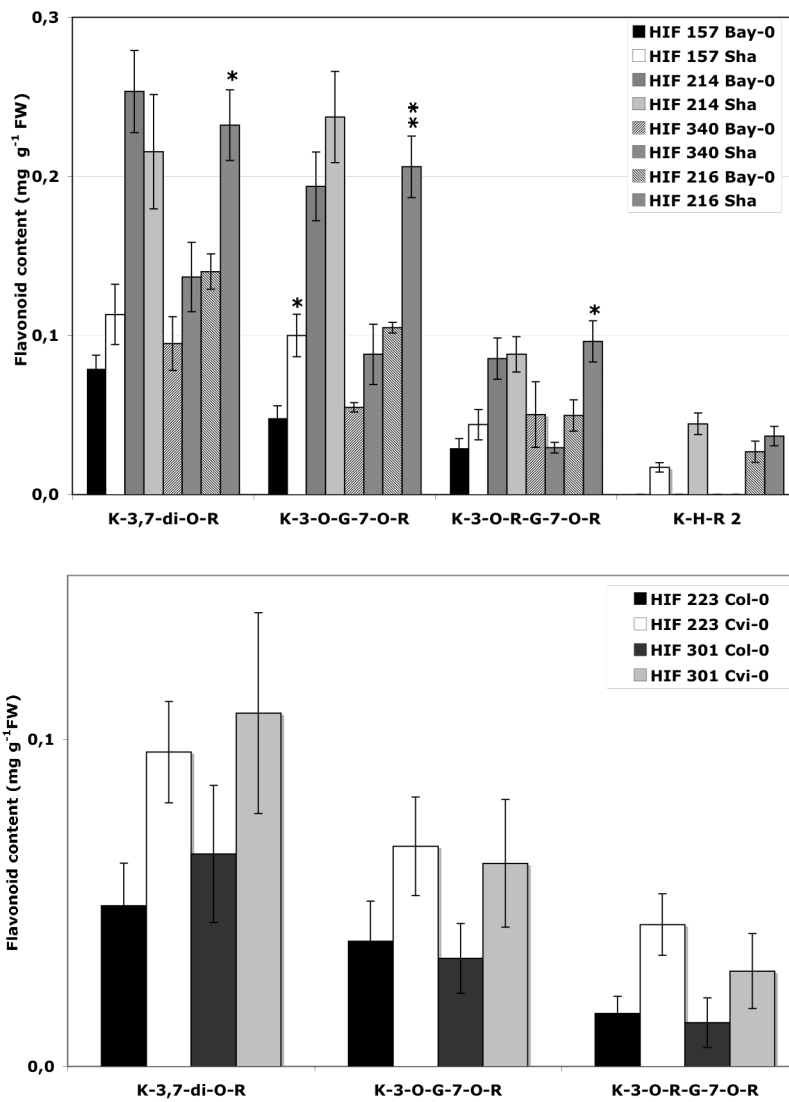

**Figure S6:** QTL 5, 13 and 15 are also confirmed in leaves using HIF lines ((HIFs 203 and , HIFs157 and 216, HIFs 157 and 214, respectively). Errors bars represent SE values of three biological repeats . G: glucoside. K: kaempferol. R: rhamnoside.



**Table S 1: Flavonoid content (mg g<sup>-1</sup>) in selected accessions.**

G: Glucoside. I: Isorhamnetin. insol.: insoluble. K: Kaempferol. Q: Quercetin. PA: proanthocyanidin. R: rhamnoside. sol.: soluble. Values are means of three independent measurements  $\pm$ SE or two independent measurements for Edi-0, Tsu-0, Blh-1, Gre-0, Alc-0, Kn-0 and Bl-1.

|         | Q-3-I-R | SE   | Q-3,7-di-O-R | SE   | Q-3-O-G-7-O-R | SE   | Flavonols | SE   | K-3-O-R | SE   | K-3,7-di-O-R | SE   | K-3-O-G-7-O-R | SE   | I-R  | SE   | I-di-R | SE   | I-I-R | SE   | PA sol. | SE   | PA insol. | SE   |
|---------|---------|------|--------------|------|---------------|------|-----------|------|---------|------|--------------|------|---------------|------|------|------|--------|------|-------|------|---------|------|-----------|------|
| Akita   | 1.95    | 0.66 | 1.02         | 0.00 | 0.32          | 0.07 | 0.22      | 0.07 | 0.01    | 0.00 | 0.24         | 0.04 | 0.36          | 0.18 | 0.05 | 0.00 | 0.08   | 0.00 | 0.09  | 0.01 | 1.13    | 0.50 | 2.61      | 1.02 |
| Alc-0   | 1.19    | 0.35 | 1.43         | 0.38 | 0.40          | 0.09 | 0.22      | 0.06 | 0.05    | 0.02 | 0.54         | 0.12 | 0.99          | 0.66 | 0.08 | 0.01 | 0.12   | 0.04 | 0.12  | 0.02 | 2.33    | 0.36 | 5.53      | 1.32 |
| Bl-1    | 1.27    | 0.19 | 0.88         | 0.06 | 0.39          | 0.09 | 0.14      | 0.00 | 0.01    | 0.00 | 0.26         | 0.03 | 0.44          | 0.21 | 0.05 | 0.01 | 0.08   | 0.01 | 0.08  | 0.02 | 0.74    | 0.01 | 2.45      | 0.66 |
| Blh-1   | 1.15    | 0.11 | 0.97         | 0.04 | 0.48          | 0.10 | 0.23      | 0.04 | 0.06    | 0.05 | 0.60         | 0.28 | 0.40          | 0.10 | 0.03 | 0.01 | 0.11   | 0.01 | 0.14  | 0.01 | 1.44    | 0.32 | 3.67      | 0.61 |
| Bur-0   | 0.50    | 0.10 | 0.81         | 0.03 | 0.34          | 0.07 | 0.16      | 0.10 | 0.01    | 0.01 | 0.20         | 0.10 | 0.56          | 0.11 | 0.03 | 0.00 | 0.10   | 0.02 | 0.12  | 0.01 | 1.26    | 0.23 | 3.79      | 0.46 |
| Col-0   | 1.16    | 0.04 | 1.14         | 0.06 | 0.39          | 0.11 | 0.30      | 0.14 | 0.02    | 0.01 | 0.12         | 0.03 | 0.25          | 0.02 | 0.04 | 0.03 | 0.10   | 0.02 | 0.08  | 0.03 | 0.73    | 0.08 | 2.87      | 0.59 |
| Condar  | 3.17    | 0.78 | 0.76         | 0.06 | 0.21          | 0.11 | 0.29      | 0.15 | 0.06    | 0.01 | 0.32         | 0.04 | 0.31          | 0.09 | 0.05 | 0.01 | 0.07   | 0.01 | 0.08  | 0.01 | 1.83    | 0.32 | 4.69      | 0.88 |
| Ct-1    | 1.85    | 0.19 | 1.16         | 0.08 | 0.46          | 0.08 | 0.15      | 0.04 | 0.01    | 0.01 | 0.25         | 0.04 | 0.40          | 0.15 | 0.04 | 0.01 | 0.12   | 0.01 | 0.12  | 0.01 | 0.91    | 0.07 | 2.68      | 0.58 |
| Cvi-0   | 0.08    | 0.02 | 1.15         | 0.06 | 0.53          | 0.17 | 0.03      | 0.01 | 0.01    | 0.00 | 0.34         | 0.08 | 0.38          | 0.10 | 0.05 | 0.02 | 0.13   | 0.01 | 0.10  | 0.04 | 2.16    | 0.28 | 4.92      | 1.00 |
| Dijon-0 | 0.81    | 0.26 | 1.21         | 0.27 | 0.44          | 0.15 | 0.19      | 0.12 | 0.05    | 0.03 | 0.40         | 0.14 | 0.65          | 0.30 | 0.06 | 0.03 | 0.08   | 0.03 | 0.11  | 0.06 | 0.53    | 0.10 | 3.33      | 0.60 |
| Dijon21 | 1.89    | 0.31 | 1.26         | 0.11 | 0.31          | 0.16 | 0.42      | 0.25 | 0.00    | 0.00 | 0.26         | 0.04 | 0.36          | 0.12 | 0.05 | 0.01 | 0.08   | 0.02 | 0.04  | 0.01 | 1.02    | 0.14 | 3.53      | 0.43 |
| Dijon-2 | 2.09    | 0.40 | 1.19         | 0.10 | 0.41          | 0.09 | 0.23      | 0.07 | 0.03    | 0.01 | 0.27         | 0.08 | 0.48          | 0.27 | 0.03 | 0.01 | 0.11   | 0.03 | 0.09  | 0.03 | 2.13    | 0.28 | 4.89      | 0.74 |
| Edi-0   | 2.32    | 0.49 | 1.18         | 0.07 | 0.63          | 0.19 | 0.11      | 0.01 | 0.05    | 0.03 | 0.28         | 0.07 | 0.59          | 0.26 | 0.06 | 0.01 | 0.12   | 0.04 | 0.11  | 0.01 | 0.68    | 0.04 | 2.07      | 0.37 |
| En-T    | 3.17    | 0.46 | 0.90         | 0.05 | 0.37          | 0.15 | 0.48      | 0.27 | 0.05    | 0.00 | 0.15         | 0.02 | 0.35          | 0.13 | 0.05 | 0.01 | 0.08   | 0.01 | 0.06  | 0.01 | 1.00    | 0.18 | 2.84      | 0.53 |
| Ge-0    | 1.60    | 0.51 | 1.42         | 0.05 | 0.33          | 0.07 | 0.17      | 0.05 | 0.05    | 0.02 | 0.31         | 0.10 | 0.51          | 0.38 | 0.04 | 0.01 | 0.11   | 0.04 | 0.10  | 0.03 | 0.91    | 0.44 | 2.44      | 0.55 |
| Gre-0   | 0.98    | 0.30 | 1.64         | 0.40 | 0.59          | 0.09 | 0.19      | 0.02 | 0.04    | 0.02 | 0.50         | 0.08 | 0.35          | 0.15 | 0.04 | 0.03 | 0.18   | 0.01 | 0.23  | 0.03 | 1.43    | 0.19 | 7.18      | 2.66 |
| Ishikaw | 1.87    | 0.55 | 1.21         | 0.14 | 0.56          | 0.12 | 0.28      | 0.06 | 0.04    | 0.00 | 0.60         | 0.14 | 0.57          | 0.16 | 0.05 | 0.01 | 0.13   | 0.02 | 0.14  | 0.03 | 1.38    | 0.15 | 3.99      | 0.97 |
| Jm-0    | 1.71    | 0.33 | 1.25         | 0.07 | 0.57          | 0.26 | 0.25      | 0.13 | 0.03    | 0.00 | 0.17         | 0.02 | 0.26          | 0.08 | 0.03 | 0.01 | 0.13   | 0.01 | 0.13  | 0.02 | 0.60    | 0.13 | 1.77      | 0.10 |
| Kn-0    | 1.70    | 0.11 | 1.16         | 0.01 | 0.51          | 0.07 | 0.14      | 0.01 | 0.03    | 0.00 | 0.22         | 0.03 | 0.28          | 0.14 | 0.03 | 0.01 | 0.11   | 0.01 | 0.12  | 0.02 | 1.23    | 0.00 | 2.67      | 0.18 |
| Lip-0   | 1.28    | 0.30 | 0.89         | 0.11 | 0.27          | 0.13 | 0.28      | 0.15 | 0.00    | 0.00 | 0.19         | 0.06 | 0.20          | 0.08 | 0.05 | 0.01 | 0.11   | 0.05 | 0.05  | 0.03 | 1.46    | 0.21 | 3.66      | 0.45 |
| Mh-1    | 1.70    | 0.09 | 1.27         | 0.13 | 0.55          | 0.05 | 0.29      | 0.13 | 0.04    | 0.02 | 0.38         | 0.08 | 0.36          | 0.13 | 0.03 | 0.00 | 0.15   | 0.01 | 0.10  | 0.02 | 0.47    | 0.01 | 2.35      | 0.57 |
| Mt-0    | 2.79    | 0.49 | 1.25         | 0.06 | 0.65          | 0.07 | 0.36      | 0.12 | 0.09    | 0.06 | 0.43         | 0.19 | 0.25          | 0.16 | 0.07 | 0.00 | 0.14   | 0.00 | 0.18  | 0.02 | 0.89    | 0.13 | 3.56      | 0.97 |
| N13     | 1.77    | 0.23 | 1.40         | 0.10 | 0.70          | 0.11 | 0.28      | 0.12 | 0.07    | 0.05 | 0.39         | 0.11 | 0.49          | 0.18 | 0.05 | 0.01 | 0.13   | 0.01 | 0.16  | 0.04 | 1.75    | 0.19 | 3.81      | 1.29 |
| N6      | 1.90    | 0.41 | 1.21         | 0.01 | 0.52          | 0.21 | 0.30      | 0.20 | 0.02    | 0.00 | 0.27         | 0.02 | 0.46          | 0.16 | 0.05 | 0.01 | 0.14   | 0.02 | 0.13  | 0.05 | 1.56    | 0.18 | 4.53      | 0.96 |
| N7      | 1.54    | 0.39 | 0.74         | 0.03 | 0.16          | 0.06 | 0.36      | 0.24 | 0.06    | 0.01 | 0.26         | 0.04 | 0.40          | 0.15 | 0.02 | 0.01 | 0.06   | 0.01 | 0.04  | 0.01 | 0.91    | 0.25 | 2.40      | 0.63 |
| Nok-0   | 3.77    | 0.73 | 1.32         | 0.03 | 0.12          | 0.04 | 0.48      | 0.32 | 0.08    | 0.01 | 1.16         | 0.07 | 2.24          | 0.85 | 0.07 | 0.01 | 0.03   | 0.01 | 0.03  | 0.01 | 3.50    | 0.52 | 4.52      | 0.72 |
| Oy-0    | 0.51    | 0.13 | 1.17         | 0.06 | 0.66          | 0.16 | 0.05      | 0.00 | 0.00    | 0.00 | 0.39         | 0.02 | 0.58          | 0.22 | 0.03 | 0.00 | 0.10   | 0.02 | 0.10  | 0.02 | 0.69    | 0.14 | 2.54      | 0.90 |
| Pa-1    | 2.96    | 0.54 | 0.86         | 0.04 | 0.26          | 0.09 | 0.23      | 0.04 | 0.05    | 0.01 | 0.16         | 0.01 | 0.15          | 0.04 | 0.05 | 0.02 | 0.06   | 0.00 | 0.04  | 0.01 | 0.86    | 0.12 | 2.46      | 0.43 |
| Pi-0    | 2.28    | 0.39 | 1.10         | 0.04 | 0.39          | 0.13 | 0.21      | 0.04 | 0.04    | 0.01 | 0.19         | 0.02 | 0.21          | 0.07 | 0.08 | 0.03 | 0.10   | 0.01 | 0.07  | 0.01 | 0.55    | 0.06 | 2.56      | 0.38 |
| Ri-0    | 2.42    | 0.51 | 0.88         | 0.10 | 0.15          | 0.07 | 0.33      | 0.19 | 0.04    | 0.01 | 0.28         | 0.05 | 0.23          | 0.06 | 0.04 | 0.01 | 0.07   | 0.01 | 0.05  | 0.01 | 0.76    | 0.08 | 2.80      | 0.54 |
| Rid-2   | 1.87    | 0.59 | 1.27         | 0.09 | 0.53          | 0.08 | 0.24      | 0.11 | 0.02    | 0.01 | 0.23         | 0.12 | 0.30          | 0.17 | 0.05 | 0.01 | 0.18   | 0.01 | 0.15  | 0.04 | 0.76    | 0.08 | 2.08      | 0.04 |
| Rubezh  | 1.41    | 0.33 | 1.23         | 0.11 | 0.26          | 0.12 | 0.22      | 0.14 | 0.04    | 0.01 | 0.32         | 0.05 | 0.33          | 0.10 | 0.04 | 0.01 | 0.08   | 0.01 | 0.06  | 0.01 | 1.38    | 0.34 | 3.50      | 0.44 |
| Sap-0   | 2.53    | 0.63 | 0.99         | 0.00 | 0.36          | 0.11 | 0.21      | 0.06 | 0.04    | 0.01 | 0.21         | 0.02 | 0.24          | 0.07 | 0.11 | 0.05 | 0.08   | 0.01 | 0.06  | 0.01 | 0.50    | 0.08 | 2.08      | 0.15 |
| Sav-0   | 3.13    | 0.87 | 1.20         | 0.01 | 0.45          | 0.16 | 0.23      | 0.05 | 0.02    | 0.00 | 0.26         | 0.05 | 0.35          | 0.10 | 0.10 | 0.04 | 0.12   | 0.02 | 0.10  | 0.01 | 0.49    | 0.12 | 1.80      | 0.71 |
| Sha     | 1.83    | 0.27 | 1.14         | 0.05 | 0.55          | 0.14 | 0.16      | 0.02 | 0.03    | 0.02 | 0.37         | 0.06 | 0.50          | 0.14 | 0.03 | 0.01 | 0.12   | 0.02 | 0.11  | 0.01 | 1.01    | 0.18 | 2.97      | 0.62 |
| Sp-0    | 5.63    | 0.46 | 0.90         | 0.01 | 0.27          | 0.12 | 0.21      | 0.06 | 0.04    | 0.00 | 0.33         | 0.01 | 0.24          | 0.07 | 0.15 | 0.05 | 0.11   | 0.02 | 0.07  | 0.01 | 2.29    | 0.48 | 4.45      | 0.82 |
| St-0    | 0.54    | 0.06 | 1.18         | 0.20 | 0.37          | 0.06 | 0.12      | 0.04 | 0.02    | 0.00 | 0.38         | 0.11 | 0.73          | 0.36 | 0.04 | 0.02 | 0.09   | 0.03 | 0.11  | 0.02 | 1.11    | 0.17 | 3.33      | 0.60 |
| Ta-0    | 2.02    | 0.46 | 1.32         | 0.04 | 0.40          | 0.14 | 0.38      | 0.23 | 0.03    | 0.01 | 0.31         | 0.03 | 0.33          | 0.10 | 0.04 | 0.01 | 0.10   | 0.01 | 0.08  | 0.03 | 0.55    | 0.12 | 1.82      | 0.15 |
| Te-0    | 3.50    | 0.99 | 1.25         | 0.06 | 0.33          | 0.17 | 0.42      | 0.25 | 0.03    | 0.01 | 0.28         | 0.04 | 0.32          | 0.10 | 0.06 | 0.02 | 0.07   | 0.02 | 0.09  | 0.03 | 2.18    | 0.45 | 3.76      | 0.97 |
| Tsu-0   | 1.65    | 0.22 | 1.14         | 0.01 | 0.53          | 0.16 | 0.14      | 0.02 | 0.02    | 0.00 | 0.28         | 0.02 | 0.50          | 0.30 | 0.03 | 0.01 | 0.09   | 0.01 | 0.10  | 0.02 | 0.57    | 0.06 | 2.03      | 0.12 |
| Yo-0    | 1.72    | 0.32 | 1.49         | 0.07 | 0.35          | 0.13 | 0.19      | 0.02 | 0.04    | 0.01 | 0.37         | 0.07 | 0.19          | 0.09 | 0.12 | 0.05 | 0.10   | 0.01 | 0.09  | 0.01 | 1.63    | 0.12 | 4.94      | 1.00 |



**Table S 5:** Flavonoid content of selected RIL lines of Cvi-0xCol-0.

G: glucoside, H/ hexoside, I: isorhamnetin. insol.: insoluble. K: kaempferol. Q: quercetin. PA: proanthocyanidin. R: rhamnoside. sol.: soluble

| Cvi-0xCol-0 | PA sol. | PA insol. | Q-3-O-R | Q-3,7-di-O-R | Q-3-O-G-7-O-R | Biflavonols | K-3-O-R | K-3,7-di-O-R | I-R  | I-di-R | I-H-R |
|-------------|---------|-----------|---------|--------------|---------------|-------------|---------|--------------|------|--------|-------|
| 6           | 3.26    | 7.59      | 1.05    | 1.69         | 0.37          | 0.26        | 0.02    | 0.29         | 0.07 | 0.16   | 0.08  |
| 8           | 7.50    | 7.64      | 2.32    | 2.47         | 0.76          | 0.43        | 0.06    | 0.87         | 0.12 | 0.24   | 0.25  |
| 9           | 4.74    | 7.31      | 0.88    | 2.13         | 0.56          | 0.19        | 0.02    | 0.39         | 0.11 | 0.15   | 0.11  |
| 10          | 4.11    | 6.79      | 1.52    | 2.53         | 0.69          | 0.33        | 0.04    | 0.38         | 0.11 | 0.19   | 0.14  |
| 16          | 3.37    | 6.62      | 1.91    | 1.77         | 0.36          | 0.35        | 0.02    | 0.49         | 0.08 | 0.11   | 0.07  |
| 17          | 5.85    | 8.43      | 1.23    | 2.70         | 0.46          | 0.22        | 0.03    | 0.57         | 0.13 | 0.20   | 0.16  |
| 20          | 2.50    | 6.17      | 2.26    | 2.65         | 0.60          | 0.44        | 0.01    | 0.35         | 0.12 | 0.16   | 0.13  |
| 22          | 2.66    | 6.51      | 0.84    | 2.58         | 0.73          | 0.19        | 0.02    | 0.30         | 0.11 | 0.27   | 0.16  |
| 24          | 2.52    | 6.09      | 1.05    | 3.08         | 0.73          | 0.36        | 0.01    | 0.29         | 0.13 | 0.27   | 0.21  |
| 26          | 8.90    | 10.69     | 0.36    | 1.77         | 0.58          | 0.13        | 0.04    | 0.84         | 0.08 | 0.28   | 0.23  |
| 31          | 5.96    | 7.28      | 2.35    | 1.70         | 0.50          | 0.53        | 0.01    | 0.25         | 0.12 | 0.17   | 0.13  |
| 34          | 8.21    | 10.20     | 0.96    | 1.61         | 0.30          | 0.26        | 0.00    | 0.71         | 0.11 | 0.21   | 0.13  |
| 39          | 6.68    | 7.67      | 1.22    | 1.38         | 0.41          | 0.28        | 0.02    | 0.34         | 0.12 | 0.15   | 0.23  |
| 42          | 6.45    | 8.97      | 2.14    | 1.73         | 0.64          | 0.49        | 0.00    | 0.23         | 0.12 | 0.18   | 0.18  |
| 47          | 3.83    | 7.14      | 1.50    | 1.92         | 0.58          | 0.39        | 0.01    | 0.47         | 0.09 | 0.23   | 0.16  |
| 49          | 6.74    | 7.44      | 1.87    | 1.84         | 0.64          | 0.51        | 0.01    | 0.27         | 0.16 | 0.19   | 0.15  |
| 51          | 5.36    | 9.01      | 0.55    | 2.11         | 0.66          | 0.19        | 0.04    | 0.50         | 0.09 | 0.17   | 0.25  |
| 53          | 4.38    | 6.95      | 0.73    | 2.05         | 0.84          | 0.22        | 0.02    | 0.29         | 0.07 | 0.18   | 0.12  |
| 55          | 5.32    | -         | 0.47    | 1.97         | 0.48          | 0.16        | 0.02    | 0.70         | 0.07 | 0.17   | 0.11  |
| 56          | 9.05    | 7.95      | 0.41    | 2.18         | 0.79          | 0.21        | 0.03    | 0.42         | 0.06 | 0.19   | 0.18  |
| 57          | 5.37    | 8.57      | 0.63    | 1.15         | 0.28          | 0.24        | 0.03    | 0.31         | 0.08 | 0.13   | 0.04  |
| 58          | 11.11   | 13.62     | 0.77    | 1.16         | 0.25          | 0.25        | 0.03    | 0.56         | 0.07 | 0.16   | 0.14  |
| 59          | 6.16    | 10.53     | 0.77    | 1.19         | 0.19          | 0.24        | 0.01    | 0.58         | 0.13 | 0.13   | 0.10  |
| 64          | 3.95    | -         | 1.03    | 1.97         | 0.54          | 0.25        | 0.03    | 0.44         | 0.16 | 0.16   | 0.08  |
| 65          | 4.67    | 10.16     | 0.63    | 1.05         | 0.30          | 0.24        | 0.02    | 0.22         | 0.09 | 0.14   | 0.09  |
| 68          | 5.11    | 7.51      | 0.93    | 2.19         | 0.50          | 0.32        | 0.02    | 1.02         | 0.12 | 0.33   | 0.26  |
| 69          | 3.41    | 6.40      | 1.31    | 1.18         | 0.46          | 0.25        | 0.06    | 0.21         | 0.14 | 0.12   | 0.13  |
| 73          | 5.67    | 5.73      | 2.23    | 1.46         | 0.26          | 0.43        | 0.04    | 0.38         | 0.09 | 0.15   | 0.08  |
| 76          | 9.83    | 6.32      | 0.95    | 0.83         | 0.23          | 0.27        | 0.00    | 0.28         | 0.11 | 0.16   | 0.10  |
| 79          | -       | 7.82      | 0.93    | 1.30         | 0.24          | 0.21        | 0.03    | 0.40         | 0.08 | 0.11   | 0.04  |
| 81          | 5.44    | 8.79      | 0.49    | 1.24         | 0.22          | 0.14        | 0.02    | 0.50         | 0.07 | 0.16   | 0.09  |
| 82          | 3.06    | 9.03      | 2.28    | 1.73         | 0.34          | 0.45        | 0.04    | 0.24         | 0.10 | 0.15   | 0.05  |
| 84          | 3.95    | 7.02      | 1.83    | 1.70         | 0.34          | 0.30        | 0.04    | 0.28         | 0.09 | 0.12   | 0.08  |
| 91          | 4.08    | 7.88      | 1.34    | 1.68         | 0.50          | 0.25        | 0.03    | 0.29         | 0.06 | 0.13   | 0.13  |
| 92          | 3.19    | 8.35      | 1.04    | 1.56         | 0.32          | 0.22        | 0.03    | 0.24         | 0.07 | 0.11   | 0.11  |
| 93          | 4.50    | 8.28      | 2.94    | 1.37         | 0.40          | 0.45        | 0.02    | 0.23         | 0.14 | 0.10   | 0.00  |
| 96          | 2.91    | 6.04      | 0.20    | 1.31         | 0.56          | 0.09        | 0.02    | 0.12         | 0.06 | 0.15   | 0.11  |
| 97          | 7.75    | 10.77     | 1.24    | 1.38         | 0.32          | 0.25        | 0.06    | 0.41         | 0.08 | 0.11   | 0.08  |
| 106         | 2.16    | 5.05      | 1.64    | 1.21         | 0.36          | 0.30        | 0.03    | 0.23         | 0.12 | 0.08   | 0.09  |
| 112         | 2.63    | 7.18      | 2.56    | 1.41         | 0.52          | 0.39        | 0.03    | 0.19         | 0.10 | 0.10   | 0.04  |
| 114         | 3.36    | 8.89      | 0.44    | 1.14         | 0.38          | 0.08        | 0.02    | 0.29         | 0.05 | 0.14   | 0.12  |
| 122         | 9.57    | 17.72     | 0.52    | 0.89         | 0.24          | 0.13        | 0.02    | 0.30         | 0.06 | 0.14   | 0.10  |
| 124         | 7.77    | 13.80     | 0.77    | 0.83         | 0.32          | 0.14        | 0.04    | 0.63         | 0.07 | 0.12   | 0.16  |
| 125         | 3.57    | 8.28      | 0.30    | 0.87         | 0.35          | 0.04        | 0.02    | 0.22         | 0.04 | 0.10   | 0.02  |
| 132         | 3.45    | 9.31      | 0.51    | 0.90         | 0.26          | 0.08        | 0.02    | 0.24         | 0.05 | 0.14   | 0.08  |
| 134         | 4.61    | 10.72     | 1.56    | 0.89         | 0.33          | 0.24        | 0.02    | 0.23         | 0.08 | 0.16   | 0.07  |
| 136         | 7.85    | 13.92     | 0.85    | 0.68         | 0.33          | 0.13        | 0.03    | 0.41         | 0.06 | 0.10   | 0.04  |
| 138         | 3.33    | 9.29      | 1.32    | 1.17         | 0.40          | 0.18        | 0.03    | 0.47         | 0.07 | 0.14   | 0.07  |
| 139         | 5.11    | 12.15     | 0.55    | 1.87         | 0.50          | 0.16        | 0.03    | 0.29         | 0.07 | 0.18   | 0.13  |
| 140         | 8.74    | 14.19     | 1.13    | 2.16         | 0.68          | 0.37        | 0.04    | 0.73         | 0.05 | 0.18   | 0.17  |
| 145         | 5.25    | 9.54      | 0.31    | 0.96         | 0.37          | 0.05        | 0.01    | 0.22         | 0.06 | 0.13   | 0.11  |
| 146         | 6.24    | 12.16     | 0.55    | 0.64         | 0.37          | 0.07        | 0.02    | 0.33         | 0.05 | 0.08   | 0.05  |
| 155         | 6.91    | 10.45     | 0.78    | 1.25         | 0.34          | 0.13        | 0.02    | 0.30         | 0.06 | 0.16   | 0.06  |
| 158         | 5.86    | 9.84      | 0.07    | 0.95         | 0.24          | 0.07        | 0.02    | 0.21         | 0.05 | 0.12   | 0.07  |
| 161         | 4.79    | 8.59      | 1.26    | 3.92         | 0.95          | 0.07        | 0.01    | 0.40         | 0.67 | 0.32   | 0.20  |
| 165         | 3.58    | 8.09      | 1.74    | 1.20         | 0.31          | 0.23        | 0.03    | 0.28         | 0.07 | 0.15   | 0.06  |
| 168         | 4.87    | 9.56      | 1.78    | 1.25         | 0.31          | 0.28        | 0.03    | 0.46         | 0.06 | 0.11   | 0.05  |
| 170         | 8.77    | 11.97     | 1.22    | 0.85         | 0.22          | 0.14        | 0.03    | 0.38         | 0.07 | 0.12   | 0.06  |
| 176         | 9.55    | 14.79     | 0.66    | 0.75         | 0.21          | 0.12        | 0.03    | 0.37         | 0.05 | 0.09   | 0.04  |
| 179         | 8.03    | 12.90     | 1.04    | 0.94         | 0.24          | 0.21        | 0.02    | 0.26         | 0.08 | 0.12   | 0.10  |
| 182         | 4.63    | 9.82      | 0.47    | 0.99         | 0.21          | 0.07        | 0.03    | 0.42         | 0.06 | 0.11   | 0.06  |
| 183         | 8.15    | 13.60     | 0.68    | 2.68         | 0.75          | 0.17        | 0.03    | 0.73         | 0.13 | 0.37   | 0.24  |
| 196         | 7.98    | 14.95     | 0.83    | 1.64         | 0.45          | 0.19        | 0.04    | 0.55         | 0.06 | 0.22   | 0.17  |
| 197         | 5.50    | 14.17     | 0.54    | 1.84         | 0.45          | 0.16        | 0.02    | 0.67         | 0.08 | 0.16   | 0.17  |
| 198         | 5.73    | 13.11     | 0.29    | 2.09         | 0.49          | 0.11        | 0.01    | 0.43         | 0.07 | 0.21   | 0.18  |
| 200         | 8.14    | 14.61     | 0.22    | 0.67         | 0.20          | 0.05        | 0.01    | 0.23         | 0.05 | 0.12   | 0.05  |
| 202         | 4.73    | 9.19      | 0.92    | 2.34         | 0.50          | 0.17        | 0.03    | 0.41         | 0.08 | 0.20   | 0.15  |
| 208         | 7.85    | 11.89     | 0.56    | 0.81         | 0.28          | 0.09        | 0.03    | 0.50         | 0.05 | 0.12   | 0.06  |
| 211         | 5.66    | 11.37     | 1.13    | 2.17         | 0.72          | 0.32        | 0.03    | 0.66         | 0.07 | 0.17   | 0.17  |
| 218         | 1.44    | 6.38      | 1.04    | 2.93         | 0.74          | 0.27        | 0.04    | 0.71         | 0.06 | 0.18   | 0.15  |
| 223         | 7.10    | 13.40     | 0.57    | 0.76         | 0.21          | 0.07        | 0.02    | 0.48         | 0.05 | 0.14   | 0.09  |
| 224         | 6.81    | 12.60     | 0.71    | 0.63         | 0.20          | 0.09        | 0.02    | 0.38         | 0.02 | 0.08   | 0.12  |
| 227         | 5.41    | 12.85     | 0.72    | 2.39         | 0.67          | 0.21        | 0.02    | 0.57         | 0.06 | 0.17   | 0.18  |
| 230         | 11.43   | 13.08     | 1.77    | 2.79         | 0.67          | 0.44        | 0.03    | 1.12         | 0.09 | 0.19   | 0.16  |
| 232         | 3.91    | 8.50      | 0.52    | 2.37         | 0.65          | 0.18        | 0.03    | 0.53         | 0.05 | 0.16   | 0.11  |
| 233         | 8.85    | 10.83     | 0.55    | 2.68         | 1.07          | 0.24        | 0.02    | 0.89         | 0.04 | 0.21   | 0.23  |
| 236         | 7.57    | 13.23     | 0.70    | 2.75         | 1.07          | 0.28        | 0.02    | 0.39         | 0.06 | 0.21   | 0.16  |
| 239         | 5.29    | 9.17      | 0.84    | 2.41         | 1.00          | 0.31        | 0.01    | 0.38         | 0.04 | 0.17   | 0.11  |
| 242         | 6.75    | 12.62     | 1.77    | 3.22         | 0.75          | 0.39        | 0.05    | 1.76         | 0.09 | 0.37   | 0.42  |
| 245         | 12.52   | 18.05     | 1.34    | 1.16         | 0.17          | 0.27        | 0.05    | 1.40         | 0.14 | 0.21   | 0.16  |
